# Supplementary material for: The yeast form of the fungus Candida albicans promotes persistence in the gut of gnotobiotic mice
Source: PubMed Central journal article supplement (PMC5673237; doi:10.1371/journal.ppat.1006699), 2017-10-25
Supplement: ppat.1006699.s002.pdf [file ppat.1006699.s002.pdf]

**Table S2. *Candida albicans* strains used in this study**

| Strain | Genotype                                                                                                                                                                                                                                                                                                          | Source    |
|--------|-------------------------------------------------------------------------------------------------------------------------------------------------------------------------------------------------------------------------------------------------------------------------------------------------------------------|-----------|
| SN152  | <u><i>ura3Δ::λimm434::URA3-IRO1</i></u> <u><i>arg4::hisG</i></u> <u><i>his1::hisG</i></u> <u><i>leu2::hisG</i></u><br><i>ura3Δ::λimm434</i> <i>arg4::hisG</i> <i>his1::hisG</i> <i>leu2::hisG</i>                                                                                                                 | [1]       |
| WO-1   | wild-type isolate                                                                                                                                                                                                                                                                                                 | [2]       |
| SN250  | <u><i>ura3Δ::λimm434::URA3-IRO1</i></u> <u><i>arg4::hisG</i></u> <u><i>his1::hisG</i></u> <u><i>leu2::hisG::CdHIS1</i></u><br><i>ura3Δ::λimm434</i> <i>arg4::hisG</i> <i>his1::hisG</i> <i>leu2::hisG::CmLEU2</i>                                                                                                 | [3]       |
| TF120  | <u><i>ura3Δ::λimm434::URA3-IRO1</i></u> <u><i>arg4::hisG</i></u> <u><i>his1::hisG</i></u> <u><i>leu2::hisG</i></u> <u><i>zfu2Δ::CdHIS1</i></u><br><i>ura3Δ::λimm434</i> <i>arg4::hisG</i> <i>his1::hisG</i> <i>leu2::hisG</i> <i>zfu2Δ::CmLEU2</i>                                                                | [3]       |
| TF141  | <u><i>ura3Δ::λimm434::URA3-IRO1</i></u> <u><i>arg4::hisG</i></u> <u><i>his1::hisG</i></u> <u><i>leu2::hisG</i></u> <u><i>zcf8Δ::CdHIS1</i></u><br><i>ura3Δ::λimm434</i> <i>arg4::hisG</i> <i>his1::hisG</i> <i>leu2::hisG</i> <i>zcf8Δ::CmLEU2</i>                                                                | [3]       |
| TF55   | <u><i>ura3Δ::λimm434::URA3-IRO1</i></u> <u><i>arg4::hisG</i></u> <u><i>his1::hisG</i></u> <u><i>leu2::hisG</i></u> <u><i>try4Δ::CdHIS1</i></u><br><i>ura3Δ::λimm434</i> <i>arg4::hisG</i> <i>his1::hisG</i> <i>leu2::hisG</i> <i>try4Δ::CmLEU2</i>                                                                | [3]       |
| TF116  | <u><i>ura3Δ::λimm434::URA3-IRO1</i></u> <u><i>arg4::hisG</i></u> <u><i>his1::hisG</i></u> <u><i>leu2::hisG</i></u> <u><i>orf19.5910Δ::CdHIS1</i></u><br><i>ura3Δ::λimm434</i> <i>arg4::hisG</i> <i>his1::hisG</i> <i>leu2::hisG</i> <i>orf19.5910Δ::CmLEU2</i>                                                    | [3]       |
| TF114  | <u><i>ura3Δ::λimm434::URA3-IRO1</i></u> <u><i>arg4::hisG</i></u> <u><i>his1::hisG</i></u> <u><i>leu2::hisG</i></u> <u><i>fgr17Δ::CdHIS1</i></u><br><i>ura3Δ::λimm434</i> <i>arg4::hisG</i> <i>his1::hisG</i> <i>leu2::hisG</i> <i>fgr17Δ::CmLEU2</i>                                                              | [3]       |
| JCP721 | <u><i>ura3Δ::λimm434::URA3-IRO1</i></u> <u><i>arg4::hisG</i></u> <u><i>his1::hisG</i></u> <u><i>leu2::hisG</i></u> <u><i>zfu2Δ::CdHIS1</i></u> <u><i>rps10Δ::ZFU2-SAT1</i></u><br><i>ura3Δ::λimm434</i> <i>arg4::hisG</i> <i>his1::hisG</i> <i>leu2::hisG</i> <i>zfu2Δ::CmLEU2</i> <i>RPS10</i>                   | This work |
| JCP758 | <u><i>ura3Δ::λimm434::URA3-IRO1</i></u> <u><i>arg4::hisG</i></u> <u><i>his1::hisG</i></u> <u><i>leu2::hisG</i></u> <u><i>zcf8Δ::CdHIS1</i></u> <u><i>rps10Δ::ZCF8-SAT1</i></u><br><i>ura3Δ::λimm434</i> <i>arg4::hisG</i> <i>his1::hisG</i> <i>leu2::hisG</i> <i>zcf8Δ::CmLEU2</i> <i>RPS10</i>                   | This work |
| JCP686 | <u><i>ura3Δ::λimm434::URA3-IRO1</i></u> <u><i>arg4::hisG</i></u> <u><i>his1::hisG</i></u> <u><i>leu2::hisG</i></u> <u><i>try4Δ::CdHIS1</i></u> <u><i>rps10Δ::TRY4-SAT1</i></u><br><i>ura3Δ::λimm434</i> <i>arg4::hisG</i> <i>his1::hisG</i> <i>leu2::hisG</i> <i>try4Δ::CmLEU2</i> <i>RPS10</i>                   | This work |
| JCP759 | <u><i>ura3Δ::λimm434::URA3-IRO1</i></u> <u><i>arg4::hisG</i></u> <u><i>his1::hisG</i></u> <u><i>leu2::hisG</i></u> <u><i>orf19.5910Δ::CdHIS1</i></u> <u><i>rps10Δ::ORF19.5910-SAT1</i></u><br><i>ura3Δ::λimm434</i> <i>arg4::hisG</i> <i>his1::hisG</i> <i>leu2::hisG</i> <i>orf19.5910Δ::CmLEU2</i> <i>RPS10</i> | This work |
| JCP837 | <u><i>ura3Δ::λimm434::URA3-IRO1</i></u> <u><i>arg4::hisG</i></u> <u><i>his1::hisG</i></u> <u><i>leu2::hisG</i></u> <u><i>FGR17::AgTEF1p-NAT1-AgTEF1UTR-TDH3p-FGR17</i></u><br><i>ura3Δ::λimm434</i> <i>arg4::hisG</i> <i>his1::hisG</i> <i>leu2::hisG</i> <i>FGR17</i>                                            | This work |
| JCP906 | <u><i>ura3Δ::λimm434::URA3-IRO1</i></u> <u><i>arg4::hisG</i></u> <u><i>his1::hisG</i></u> <u><i>leu2::hisG::CdHIS1</i></u> <u><i>UME6::AgTEF1p-NAT1-AgTEF1UTR-TDH3p-UME6</i></u><br><i>ura3Δ::λimm434</i> <i>arg4::hisG</i> <i>his1::hisG</i> <i>leu2::hisG::CmLEU2</i> <i>UME6</i>                               | This work |
| JCP907 | <u><i>ura3Δ::λimm434::URA3-IRO1</i></u> <u><i>arg4::hisG</i></u> <u><i>his1::hisG</i></u> <u><i>leu2::hisG::CdHIS1</i></u> <u><i>WOR3::AgTEF1p-NAT1-AgTEF1UTR-TDH3p-WOR3</i></u><br><i>ura3Δ::λimm434</i> <i>arg4::hisG</i> <i>his1::hisG</i> <i>leu2::hisG::CmLEU2</i> <i>WOR3</i>                               | This work |

1. Noble SM, Johnson AD (2005) Strains and strategies for large-scale gene deletion studies of the diploid human fungal pathogen *Candida albicans*. *Eukaryot Cell* 4:298-309.
2. Slutsky B, Staebell M, Anderson J, Risen L, Pfaller M, et al. (1987) "White-opaque transition": a second high-frequency switching system in *Candida albicans*. *J Bacteriol* 169:189-197.
3. Homann OR, Dea J, Noble SM, Johnson AD (2009) A phenotypic profile of the *Candida albicans* regulatory network. *PLoS Genet* 5:e1000783.
