# Supplementary material for: The yeast form of the fungus Candida albicans promotes persistence in the gut of gnotobiotic mice
Source: PubMed Central journal article supplement (PMC5673237; doi:10.1371/journal.ppat.1006699), 2017-10-25
Supplement: ppat.1006699.s003.pdf [file ppat.1006699.s003.pdf]

**Table S3. Oligos used in this study**

| <b>Name</b> | <b>Description</b>      | <b>Sequence (5' to 3')</b>                                                                                |
|-------------|-------------------------|-----------------------------------------------------------------------------------------------------------|
| JCP1910     | orf19.6781_addback_for  | CATGCTCGAGATGTCTAAAAGAAGAACGGTGAAACGATCAAGAAATGGTT<br>GTTTAAAGTTGTAAAAAATTACGAATAAAATGTGATGAATCTAAACCAACA |
| JCP1589     | orf19.6781_addback_rev  | CATGCTCGAGTTAATTAACATCTAGTTCAGGAAATTC                                                                     |
| JCP1584     | orf19.1718_addback_for  | CATGCTCGAGATGGAAAGTAATCTATCTAATACTG                                                                       |
| JCP1585     | orf19.1718_addback_rev  | CATGCTCGAGTTATTCAAAGATATTTGGTTCAACAC                                                                      |
| JCP1592     | orf19.5975_addback_for  | CATGCTCGAGATGTCTTTACCAATGTCACCTG                                                                          |
| JCP1593     | orf19.5975_addback_rev  | CATGCTCGAGTTAACTGACCAACATATTAACTG                                                                         |
| JCP1578     | orf19.5910_addback_for1 | CATGCATATGCTCGAGATGAATCTGGTACTGGCAAACCTG                                                                  |
| JCP1579     | orf19.5910_addback_rev1 | TGTGAATTCCTTCCCGAAATAGAATTTAAAGAAATAACAGC                                                                 |
| JCP1580     | orf19.5910_addback_for2 | GAAAGAATTCACAATATGGGTACCAATCGATAGATCAGCTCGAACAGGATG<br>TCGAAAATTTGCG                                      |
| JCP1581     | orf19.5910_addback_rev2 | CATGAAGCTTCTCGAGCTAGTCTTGCAAAAATTTCTCTAACTC<br>GTCAAATTTATTAGAGAAAATTATGCTTATGAAAGATACCCCTCGATCTTAAC      |
| JCP2040     | FGR17_TDH3_for          | AATAGTATTGAACGCCCTATCAAGCTTGCCTCGTCCCC                                                                    |
| JCP2041     | FGR17_TDH3_rev          | TACATTTTCTTCTACGTTTACGACAATTATCACAAGCAATTGAAACGTAAGA<br>TCTAGATTTTGACAGCATATTTGAATTCAATTGTGATG            |
| JCP2122     | WOR3_TDH3_for           | TTCCTCACTAAATTATAGCCATAGAGATACTATCAACAAAGACCCTTAATTT<br>CTTTACCCTTTTAGTCACATCAAGCTTGCCTCGTCCCC            |
| JCP2123     | WOR3_TDH3_rev           | TATCTTGGGATAATTGTTGGTGATTCACATTTGCATCCAATTGTTGTTGGTCC<br>AAATATGTTTGATCCATATTTGAATTCAATTGTGATG            |
| JCP2125     | UME6_TDH3_for           | AATCCTGTTATTATAATCAAGGTTAGATATATAATTGGCTCATTATTGCTTTGC<br>TTTACATAATTGGTGAATCAAGCTTGCCTCGTCCCC            |
| JCP2126     | UME6_TDH3_rev           | TTGTATCTTCTCCATAAGGCGAATTTGGTGCTGAAGAAGTTGAATCGGGTG<br>TAACCATATGGGTAATCATATTTGAATTCAATTGTGATG            |
